# Supplementary material for: From rust to riches: phytochemically assisted synthesis of superparamagnetic Fe3O4 nanoparticles with Au for SERS sensing
Source: Royal Society of Chemistry journal article supplement (doi:10.1039/d4lf00121d), 2024-01-01
Supplement: d4lf00121d1.pdf [file d4lf00121d1.pdf]

## EDAX TEAM EDS

### bare Fe3O4

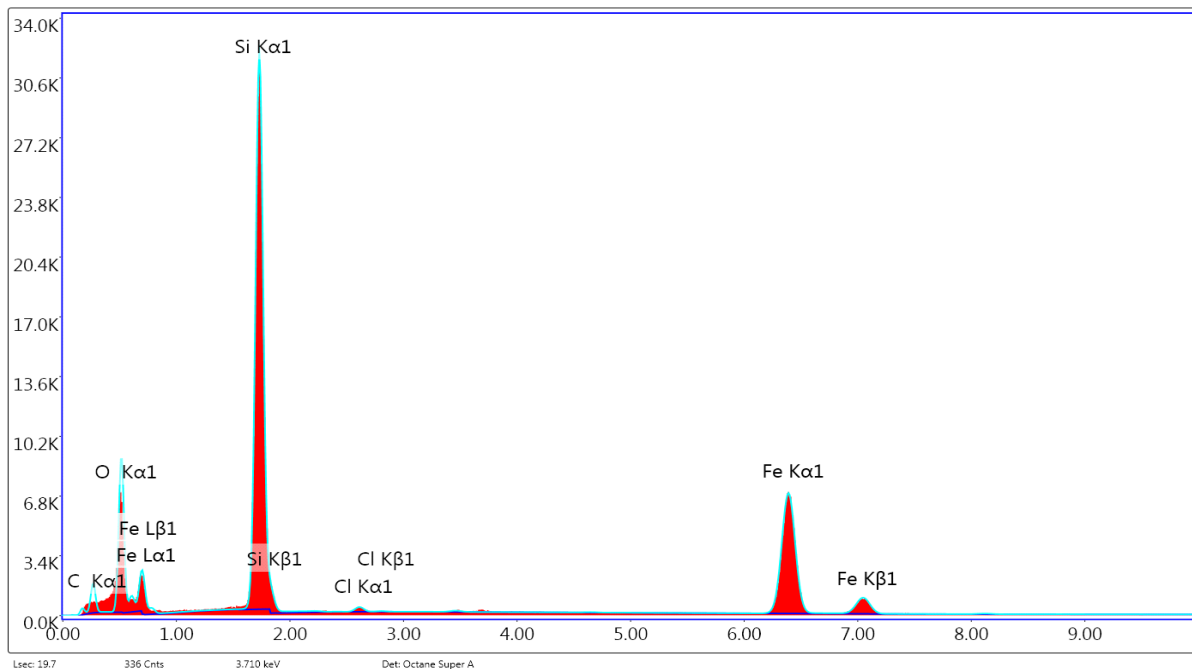

| Element | Wt %  | Atomic % | Error % | Net Int. | K Ratio | Z      | R      | A      | F      |
|---------|-------|----------|---------|----------|---------|--------|--------|--------|--------|
| C K     | 18.04 | 31.33    | 10.76   | 406.00   | 0.0292  | 1.1042 | 0.0000 | 0.1466 | 1.0000 |
| O K     | 28.39 | 37.02    | 9.05    | 2632.31  | 0.0676  | 1.0626 | 0.0000 | 0.2242 | 1.0000 |
| Fe L    | 21.88 | 8.17     | 7.92    | 740.86   | 0.0688  | 0.8468 | 0.0000 | 0.3715 | 1.0000 |
| Si K    | 31.37 | 23.29    | 4.41    | 13402.77 | 0.2031  | 0.9759 | 0.0000 | 0.6618 | 1.0028 |
| Cl K    | 0.32  | 0.19     | 12.55   | 104.59   | 0.0021  | 0.9123 | 0.0000 | 0.7144 | 1.0132 |

# EDAX TEAM EDS

## bare Fe3O4

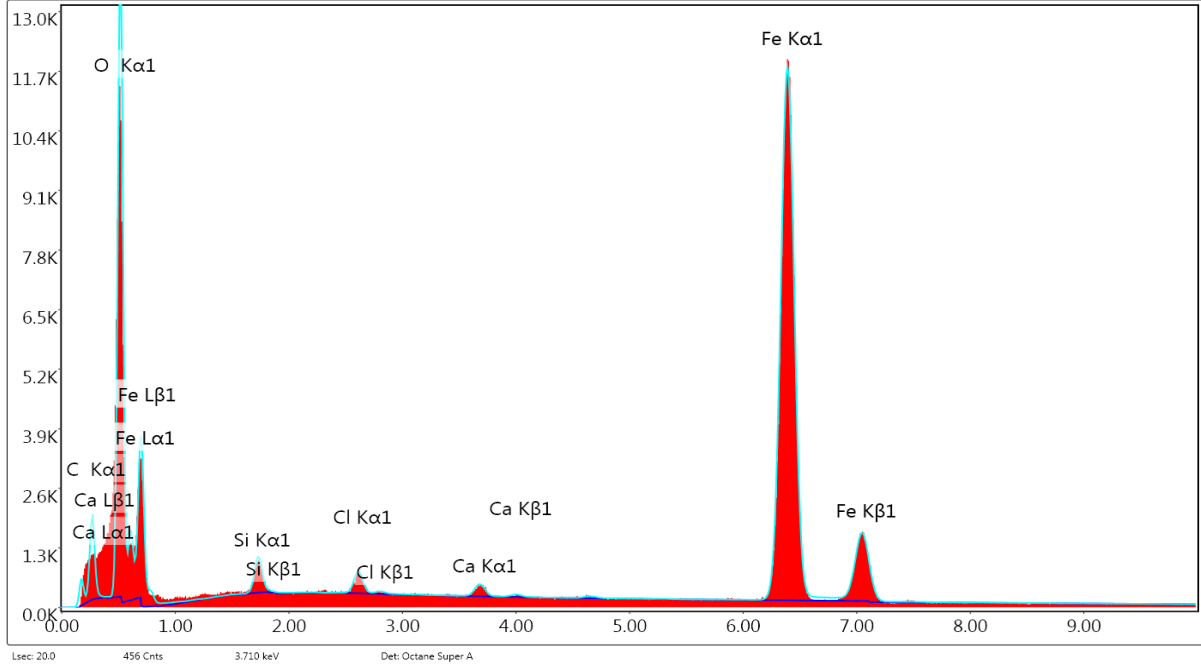

| Element | Wt %  | Atomic % | Error % | Net Int. | K Ratio | Z      | R      | A      | F      |
|---------|-------|----------|---------|----------|---------|--------|--------|--------|--------|
| C K     | 12.69 | 24.77    | 9.68    | 405.08   | 0.0380  | 1.1413 | 0.0000 | 0.2624 | 1.0000 |
| O K     | 36.18 | 53.03    | 7.73    | 4068.95  | 0.1363  | 1.0997 | 0.0000 | 0.3426 | 1.0000 |
| Fe L    | 48.74 | 20.46    | 7.95    | 1246.99  | 0.1511  | 0.8769 | 0.0000 | 0.3535 | 1.0000 |
| Si K    | 1.13  | 0.95     | 9.43    | 285.47   | 0.0056  | 1.0127 | 0.0000 | 0.4890 | 1.0058 |
| Cl K    | 0.73  | 0.48     | 10.27   | 220.39   | 0.0058  | 0.9477 | 0.0000 | 0.8084 | 1.0261 |
| Ca K    | 0.53  | 0.31     | 11.22   | 146.59   | 0.0053  | 0.9641 | 0.0000 | 0.9519 | 1.0901 |

# EDAX TEAM EDS

## bare Fe3O4

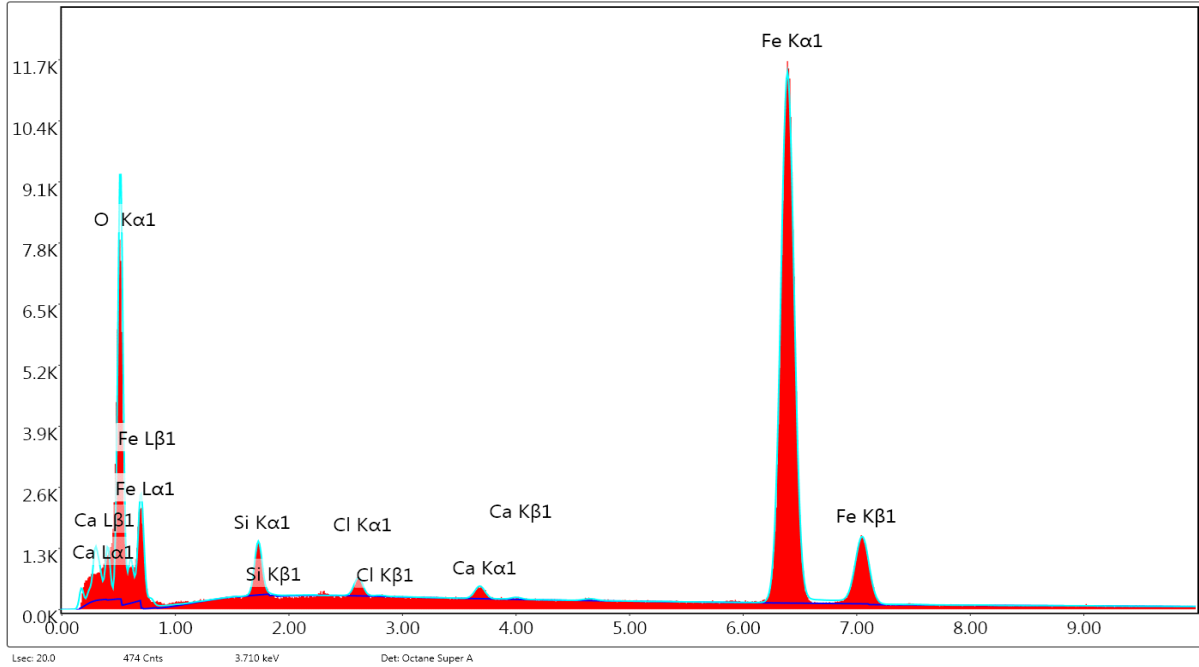

| Element | Wt %  | Atomic % | Error % | Net Int. | K Ratio | Z      | R      | A      | F      |
|---------|-------|----------|---------|----------|---------|--------|--------|--------|--------|
| O K     | 36.32 | 64.88    | 6.86    | 2758.57  | 0.1836  | 1.1347 | 0.0000 | 0.4455 | 1.0000 |
| Fe L    | 57.50 | 29.43    | 8.20    | 822.85   | 0.1980  | 0.9051 | 0.0000 | 0.3805 | 1.0000 |
| Si K    | 3.82  | 3.89     | 8.28    | 467.01   | 0.0183  | 1.0464 | 0.0000 | 0.4562 | 1.0057 |
| Cl K    | 1.27  | 1.03     | 9.76    | 188.49   | 0.0098  | 0.9797 | 0.0000 | 0.7650 | 1.0251 |
| Ca K    | 1.09  | 0.78     | 13.25   | 152.46   | 0.0109  | 0.9971 | 0.0000 | 0.9265 | 1.0857 |

# EDAX TEAM EDS

## bare Fe3O4

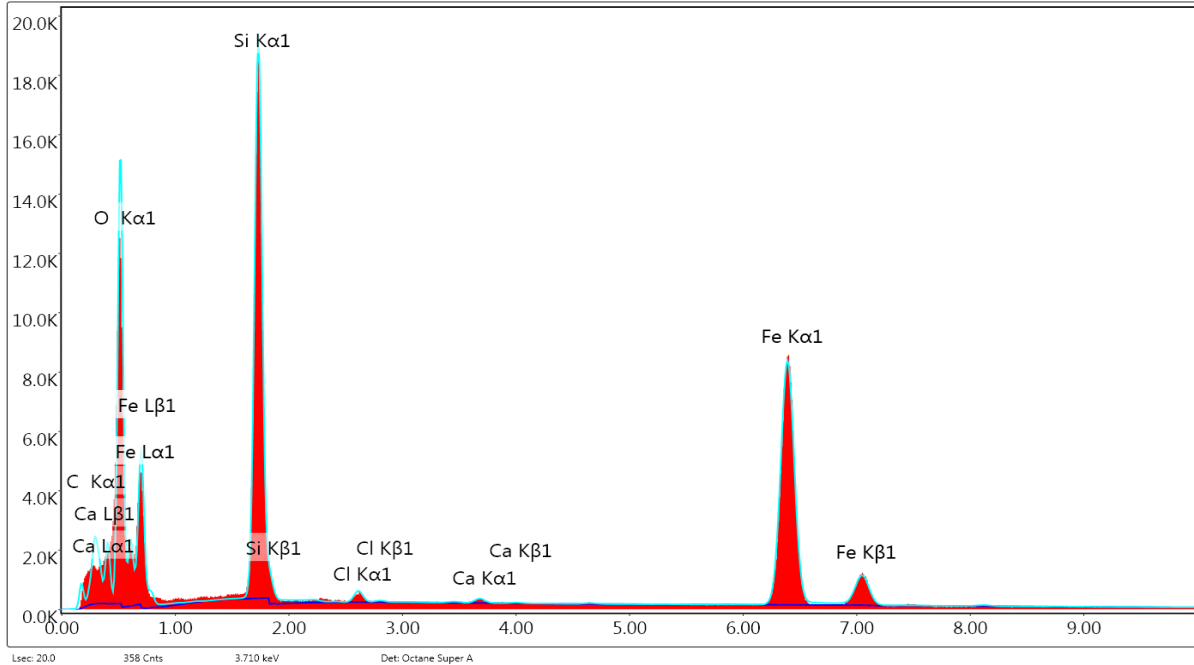

| Element | Wt %  | Atomic % | Error % | Net Int. | K Ratio | Z      | R      | A      | F      |
|---------|-------|----------|---------|----------|---------|--------|--------|--------|--------|
| C K     | 15.61 | 29.13    | 9.96    | 616.53   | 0.0333  | 1.1261 | 0.0000 | 0.1894 | 1.0000 |
| O K     | 30.47 | 42.69    | 8.40    | 4664.89  | 0.0900  | 1.0845 | 0.0000 | 0.2723 | 1.0000 |
| Fe L    | 37.19 | 14.93    | 7.65    | 1719.97  | 0.1200  | 0.8646 | 0.0000 | 0.3731 | 1.0000 |
| Si K    | 16.23 | 12.95    | 5.53    | 7983.76  | 0.0908  | 0.9977 | 0.0000 | 0.5585 | 1.0043 |
| Cl K    | 0.32  | 0.20     | 11.84   | 152.90   | 0.0023  | 0.9333 | 0.0000 | 0.7558 | 1.0200 |
| Ca K    | 0.18  | 0.10     | 17.42   | 82.51    | 0.0017  | 0.9491 | 0.0000 | 0.9282 | 1.0701 |

# EDAX TEAM EDS

## cysAuFe3O4

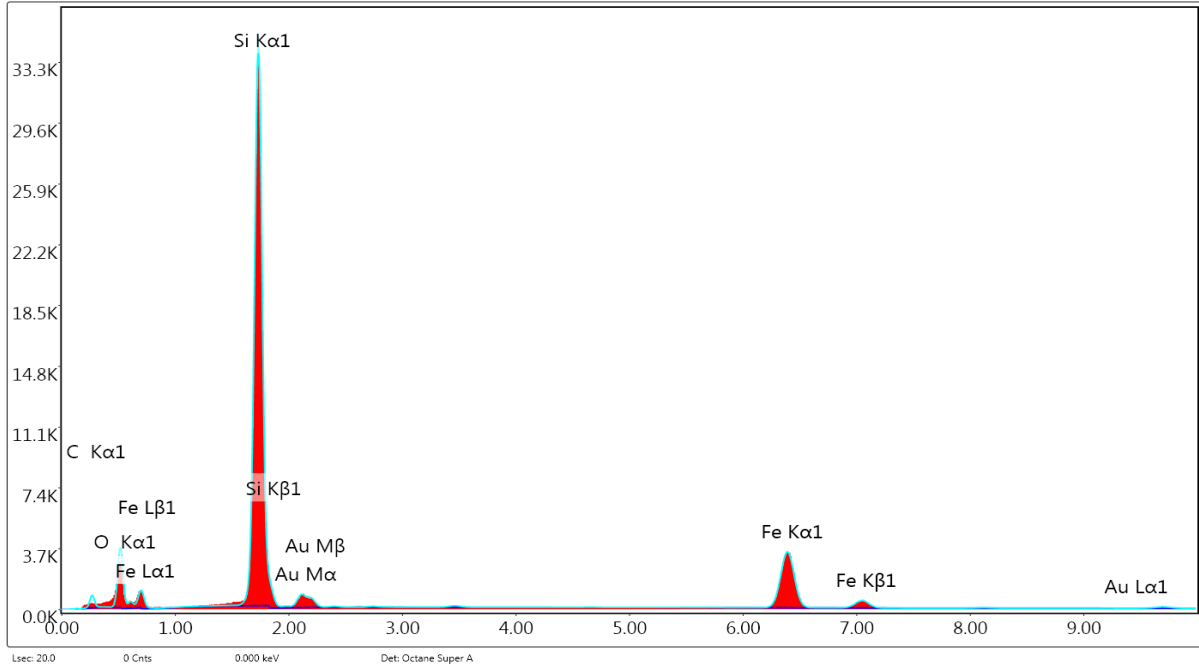

| Element | Wt %  | Atomic % | Error % | Net Int. | K Ratio | Z      | R      | A      | F      |
|---------|-------|----------|---------|----------|---------|--------|--------|--------|--------|
| C K     | 16.31 | 29.58    | 12.10   | 183.62   | 0.0212  | 1.1104 | 0.0000 | 0.1172 | 1.0000 |
| O K     | 21.07 | 28.70    | 9.60    | 1069.11  | 0.0441  | 1.0688 | 0.0000 | 0.1960 | 1.0000 |
| Fe L    | 12.89 | 5.03     | 7.89    | 304.90   | 0.0455  | 0.8519 | 0.0000 | 0.4144 | 1.0000 |
| Si K    | 46.90 | 36.38    | 3.54    | 14123.71 | 0.3440  | 0.9821 | 0.0000 | 0.7460 | 1.0012 |
| Au L    | 2.83  | 0.31     | 17.79   | 66.03    | 0.0178  | 0.5973 | 0.0000 | 1.0532 | 0.9999 |

# EDAX TEAM EDS

## cysAuFe3O4

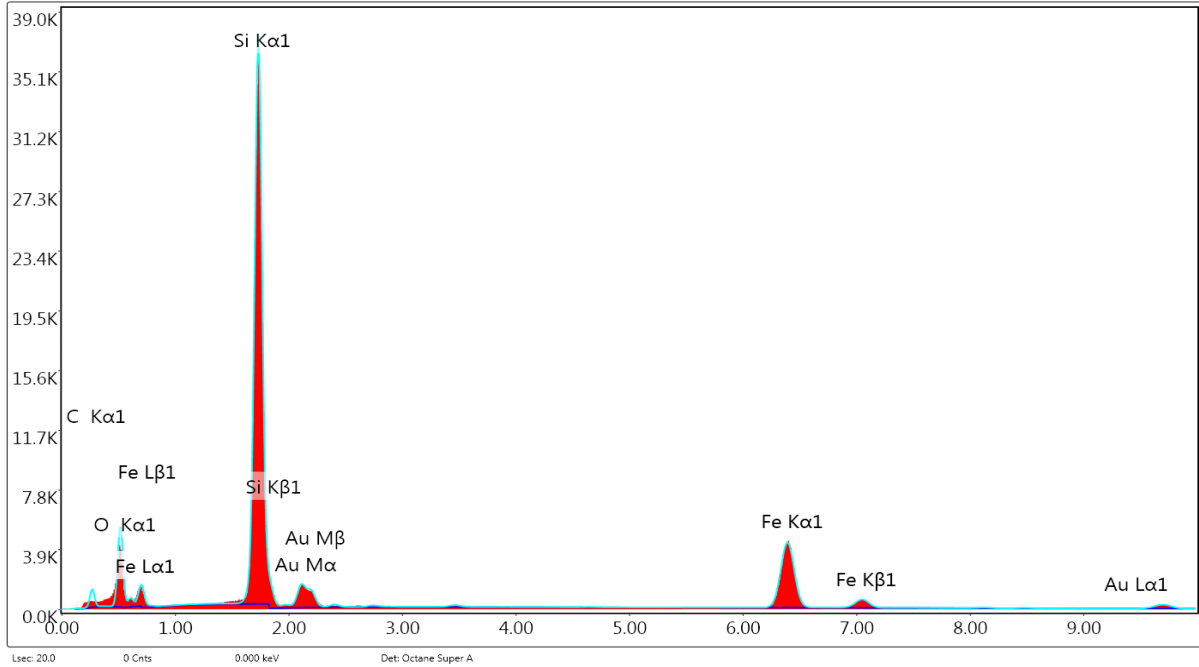

| Element | Wt %  | Atomic % | Error % | Net Int. | K Ratio | Z      | R      | A      | F      |
|---------|-------|----------|---------|----------|---------|--------|--------|--------|--------|
| C K     | 17.55 | 32.14    | 11.51   | 300.17   | 0.0260  | 1.1213 | 0.0000 | 0.1322 | 1.0000 |
| O K     | 22.63 | 31.12    | 9.46    | 1562.16  | 0.0483  | 1.0800 | 0.0000 | 0.1978 | 1.0000 |
| Fe L    | 13.05 | 5.14     | 7.83    | 397.14   | 0.0444  | 0.8610 | 0.0000 | 0.3955 | 1.0000 |
| Si K    | 39.27 | 30.76    | 3.83    | 15343.96 | 0.2801  | 0.9938 | 0.0000 | 0.7169 | 1.0013 |
| Au L    | 7.51  | 0.84     | 12.11   | 236.84   | 0.0478  | 0.6067 | 0.0000 | 1.0512 | 0.9989 |

# EDAX TEAM EDS

## cysAuFe3O4

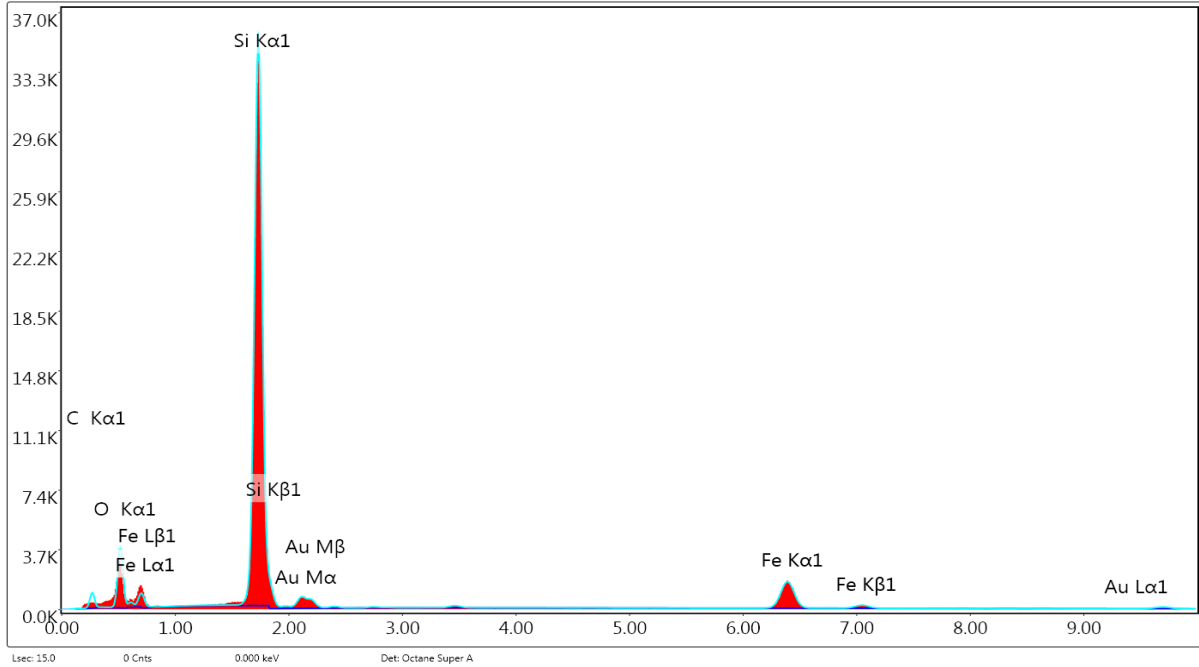

| Element | Wt %  | Atomic % | Error % | Net Int. | K Ratio | Z      | R      | A      | F      |
|---------|-------|----------|---------|----------|---------|--------|--------|--------|--------|
| C K     | 17.70 | 32.48    | 11.75   | 322.82   | 0.0243  | 1.1161 | 0.0000 | 0.1230 | 1.0000 |
| O K     | 19.48 | 26.84    | 9.59    | 1515.22  | 0.0408  | 1.0746 | 0.0000 | 0.1947 | 1.0000 |
| Fe L    | 15.72 | 6.20     | 7.83    | 583.93   | 0.0568  | 0.8566 | 0.0000 | 0.4219 | 1.0000 |
| Si K    | 43.40 | 34.06    | 3.78    | 19531.15 | 0.3099  | 0.9880 | 0.0000 | 0.7217 | 1.0013 |
| Au L    | 3.71  | 0.41     | 17.46   | 133.30   | 0.0234  | 0.6018 | 0.0000 | 1.0509 | 0.9980 |

# EDAX TEAM EDS

## cysAuFe3O4

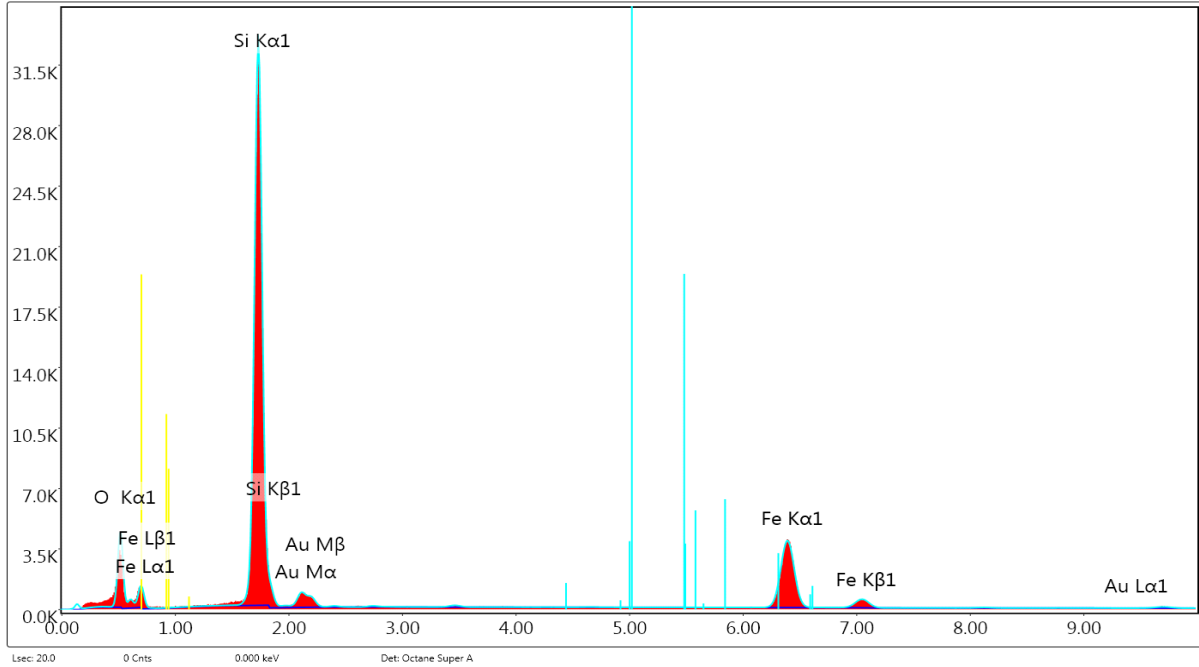

| Element | Wt %  | Atomic % | Error % | Net Int. | K Ratio | Z      | R      | A      | F      |
|---------|-------|----------|---------|----------|---------|--------|--------|--------|--------|
| O K     | 23.04 | 38.25    | 9.03    | 1244.37  | 0.0627  | 1.1007 | 0.0000 | 0.2471 | 1.0000 |
| Fe L    | 17.75 | 8.44     | 7.47    | 377.09   | 0.0687  | 0.8775 | 0.0000 | 0.4408 | 1.0000 |
| Si K    | 55.87 | 52.85    | 3.93    | 13499.62 | 0.4010  | 1.0128 | 0.0000 | 0.7078 | 1.0011 |
| Au L    | 3.34  | 0.45     | 19.37   | 65.71    | 0.0216  | 0.6180 | 0.0000 | 1.0474 | 0.9970 |



# EDAX TEAM EDS

## cysAuFe3O4

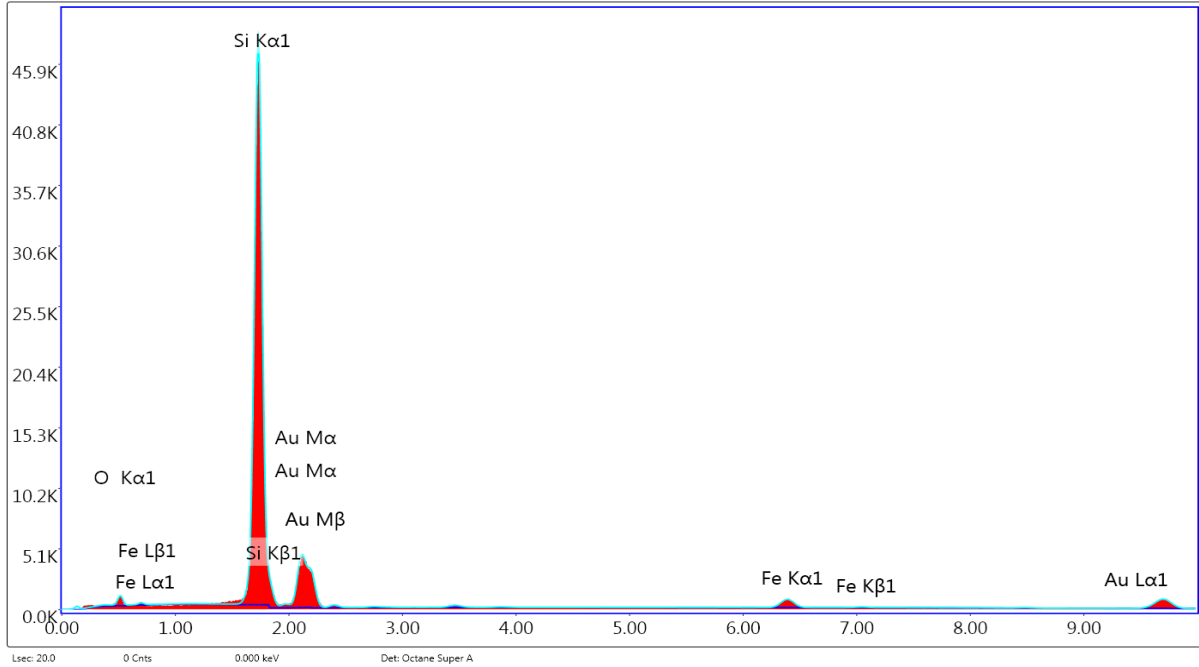

| Element | Wt %  | Atomic % | Error % | Net Int. | K Ratio | Z      | R      | A      | F      |
|---------|-------|----------|---------|----------|---------|--------|--------|--------|--------|
| O K     | 4.88  | 11.05    | 12.32   | 216.79   | 0.0103  | 1.1929 | 0.0000 | 0.1775 | 1.0000 |
| Fe L    | 0.95  | 0.62     | 19.23   | 27.71    | 0.0048  | 0.9521 | 0.0000 | 0.5255 | 1.0000 |
| Si K    | 64.17 | 82.81    | 3.15    | 19703.72 | 0.5538  | 1.1038 | 0.0000 | 0.7815 | 1.0004 |
| Au M    | 30.00 | 5.52     | 3.81    | 1659.02  | 0.1765  | 0.7466 | 0.0000 | 0.7904 | 0.9971 |

# EDAX TEAM EDS

**gluAuFe3O4**

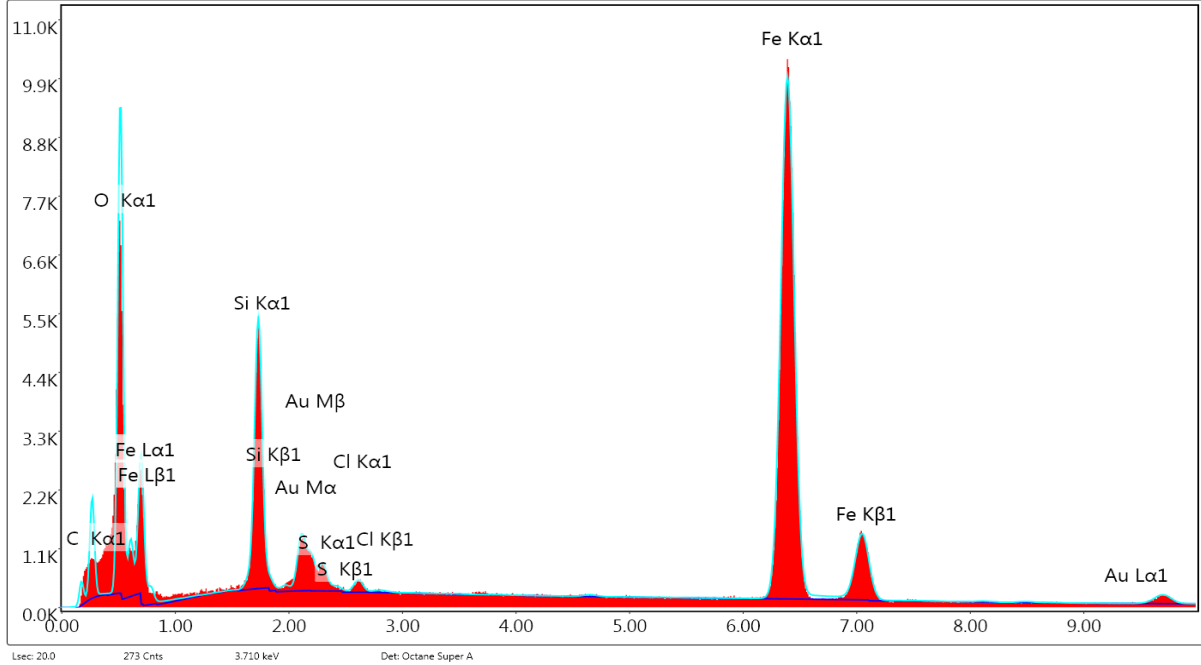

| Element | Wt %  | Atomic % | Error % | Net Int. | K Ratio | Z      | R      | A      | F      |
|---------|-------|----------|---------|----------|---------|--------|--------|--------|--------|
| C K     | 17.35 | 32.53    | 9.93    | 467.09   | 0.0450  | 1.1374 | 0.0000 | 0.2279 | 1.0000 |
| O K     | 32.15 | 45.27    | 8.62    | 2754.58  | 0.0948  | 1.0961 | 0.0000 | 0.2689 | 1.0000 |
| Fe L    | 36.09 | 14.56    | 8.01    | 897.25   | 0.1116  | 0.8741 | 0.0000 | 0.3538 | 1.0000 |
| Si K    | 7.71  | 6.18     | 6.10    | 2094.00  | 0.0425  | 1.0098 | 0.0000 | 0.5443 | 1.0026 |
| S K     | 0.86  | 0.61     | 10.87   | 231.78   | 0.0058  | 0.9921 | 0.0000 | 0.6755 | 1.0072 |
| Cl K    | 0.36  | 0.23     | 14.73   | 95.68    | 0.0026  | 0.9452 | 0.0000 | 0.7480 | 1.0115 |
| Au L    | 5.48  | 0.63     | 16.07   | 155.28   | 0.0349  | 0.6187 | 0.0000 | 1.0383 | 0.9907 |

# EDAX TEAM EDS

## gluAuFe3O4

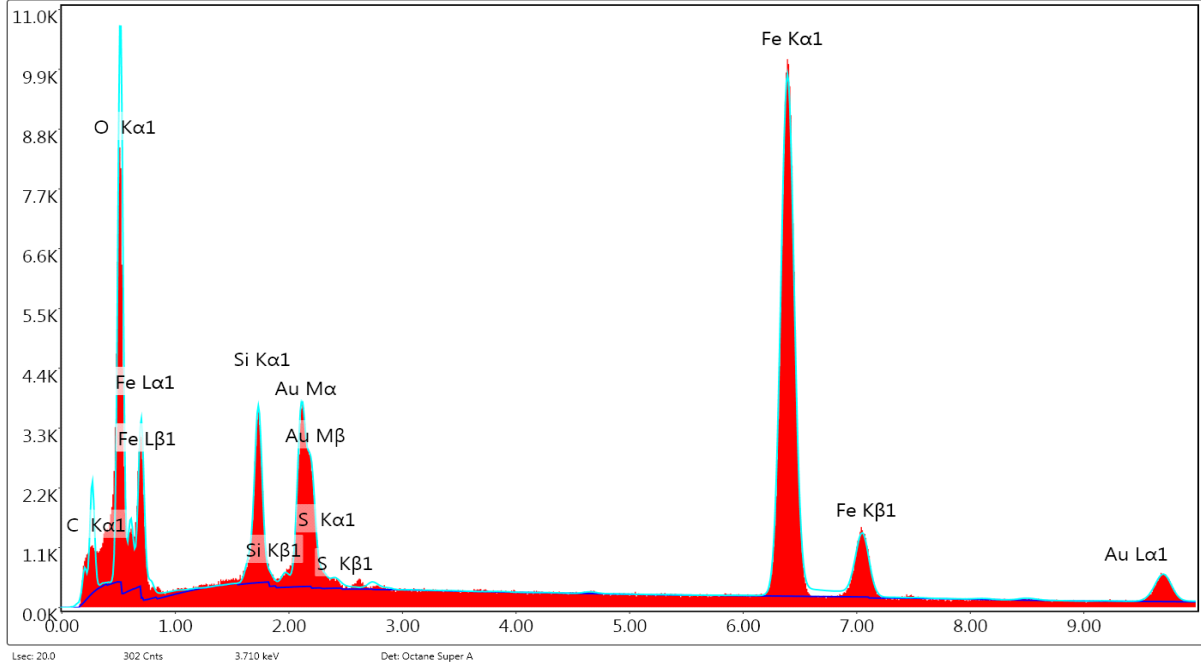

Lsec: 20.0 302 Cnts 3.710 keV Det: Octane Super-A

| Element | Wt %  | Atomic % | Error % | Net Int. | K Ratio | Z      | R      | A      | F      |
|---------|-------|----------|---------|----------|---------|--------|--------|--------|--------|
| C K     | 15.88 | 31.64    | 9.53    | 566.99   | 0.0476  | 1.1580 | 0.0000 | 0.2587 | 1.0000 |
| O K     | 31.99 | 47.85    | 8.60    | 3245.20  | 0.0948  | 1.1177 | 0.0000 | 0.2651 | 1.0000 |
| Fe L    | 35.34 | 15.14    | 8.05    | 1018.69  | 0.1087  | 0.8945 | 0.0000 | 0.3440 | 1.0000 |
| Si K    | 4.29  | 3.65     | 6.65    | 1385.26  | 0.0228  | 1.0331 | 0.0000 | 0.5134 | 1.0022 |
| S K     | 0.31  | 0.23     | 20.27   | 99.47    | 0.0020  | 1.0159 | 0.0000 | 0.6316 | 1.0063 |
| Au L    | 12.19 | 1.48     | 8.73    | 481.58   | 0.0809  | 0.6455 | 0.0000 | 1.0370 | 0.9918 |

# EDAX TEAM EDS

## gluAuFe3O4

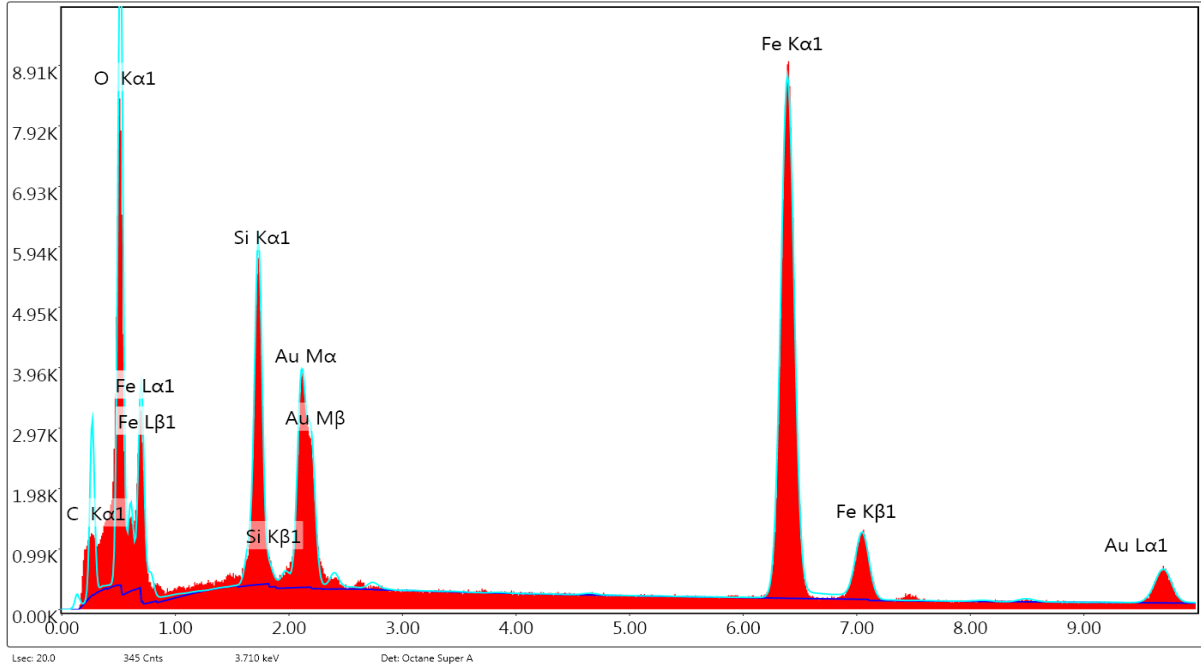

Lsec: 20.0 345 Cnts 3.710 keV Det: Octane Super-A

| Element | Wt %  | Atomic % | Error % | Net Int. | K Ratio | Z      | R      | A      | F      |
|---------|-------|----------|---------|----------|---------|--------|--------|--------|--------|
| C K     | 18.81 | 36.10    | 9.42    | 753.95   | 0.0549  | 1.1492 | 0.0000 | 0.2540 | 1.0000 |
| O K     | 30.42 | 43.83    | 8.79    | 3279.30  | 0.0831  | 1.1089 | 0.0000 | 0.2465 | 1.0000 |
| Fe L    | 32.99 | 13.62    | 8.08    | 1095.00  | 0.1014  | 0.8874 | 0.0000 | 0.3466 | 1.0000 |
| Si K    | 6.21  | 5.10     | 6.16    | 2364.41  | 0.0337  | 1.0246 | 0.0000 | 0.5294 | 1.0022 |
| Au L    | 11.58 | 1.36     | 8.26    | 523.54   | 0.0764  | 0.6394 | 0.0000 | 1.0394 | 0.9922 |

# EDAX TEAM EDS

**gluAuFe3O4**

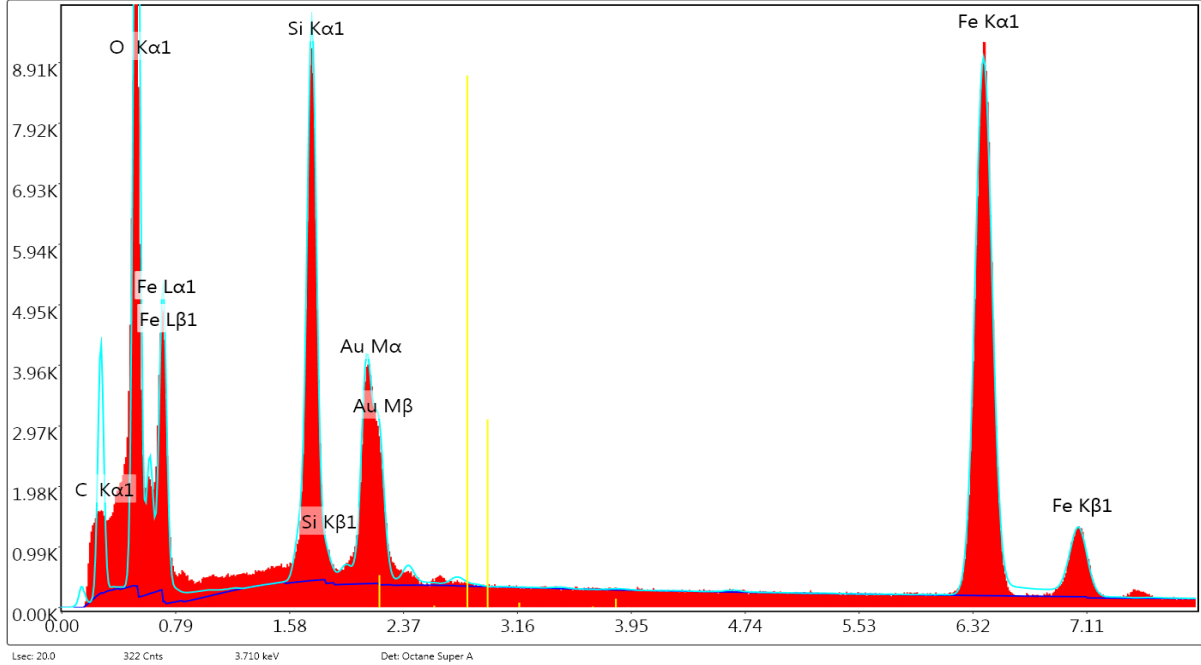

| Element | Wt %  | Atomic % | Error % | Net Int. | K Ratio | Z      | R      | A      | F      |
|---------|-------|----------|---------|----------|---------|--------|--------|--------|--------|
| C K     | 19.31 | 36.60    | 9.18    | 1054.71  | 0.0536  | 1.1413 | 0.0000 | 0.2435 | 1.0000 |
| O K     | 29.30 | 41.70    | 8.62    | 4555.28  | 0.0807  | 1.1010 | 0.0000 | 0.2501 | 1.0000 |
| Fe L    | 36.49 | 14.88    | 7.77    | 1777.58  | 0.1150  | 0.8809 | 0.0000 | 0.3579 | 1.0000 |
| Si K    | 7.35  | 5.96     | 6.06    | 3932.48  | 0.0392  | 1.0165 | 0.0000 | 0.5237 | 1.0024 |
| Au L    | 7.55  | 0.87     | 8.52    | 483.07   | 0.0492  | 0.6327 | 0.0000 | 1.0390 | 0.9909 |

# EDAX TEAM EDS

## hisAuFe3O4

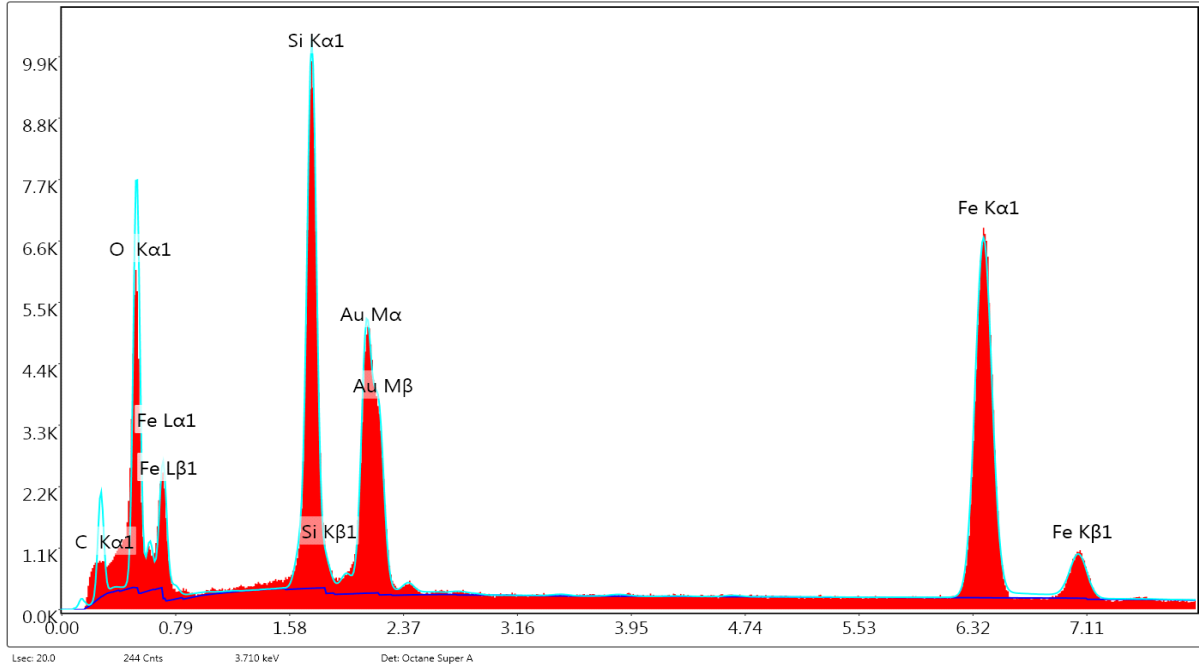

Lsec: 20.0 244 Cnts 3.710 keV Det: Octane Super-A

| Element | Wt %  | Atomic % | Error % | Net Int. | K Ratio | Z      | R      | A      | F      |
|---------|-------|----------|---------|----------|---------|--------|--------|--------|--------|
| C K     | 16.57 | 33.90    | 10.07   | 473.59   | 0.0427  | 1.1721 | 0.0000 | 0.2200 | 1.0000 |
| O K     | 28.06 | 43.08    | 9.14    | 2235.44  | 0.0702  | 1.1319 | 0.0000 | 0.2212 | 1.0000 |
| Fe L    | 21.88 | 9.62     | 8.61    | 597.86   | 0.0687  | 0.9061 | 0.0000 | 0.3462 | 1.0000 |
| Si K    | 12.30 | 10.76    | 5.52    | 4166.87  | 0.0737  | 1.0475 | 0.0000 | 0.5710 | 1.0018 |
| Au L    | 21.19 | 2.64     | 6.17    | 799.04   | 0.1444  | 0.6575 | 0.0000 | 1.0414 | 0.9956 |

# EDAX TEAM EDS

## hisAuFe3O4

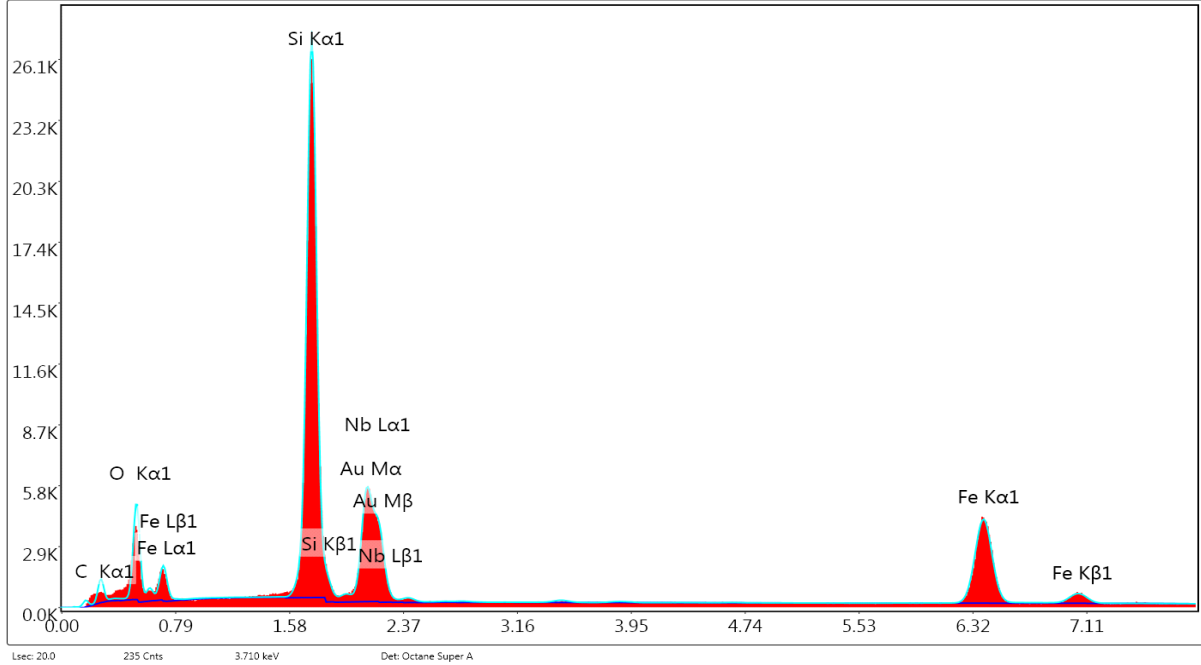

| Element | Wt %  | Atomic % | Error % | Net Int. | K Ratio | Z      | R      | A      | F      |
|---------|-------|----------|---------|----------|---------|--------|--------|--------|--------|
| C K     | 13.48 | 30.25    | 11.54   | 277.77   | 0.0248  | 1.1900 | 0.0000 | 0.1546 | 1.0000 |
| O K     | 19.37 | 32.64    | 9.62    | 1344.40  | 0.0418  | 1.1494 | 0.0000 | 0.1877 | 1.0000 |
| Fe L    | 11.82 | 5.70     | 8.33    | 367.82   | 0.0418  | 0.9202 | 0.0000 | 0.3842 | 1.0000 |
| Si K    | 28.69 | 27.53    | 4.58    | 11246.23 | 0.1968  | 1.0645 | 0.0000 | 0.6436 | 1.0015 |
| Nb L    | 1.47  | 0.43     | 13.45   | 197.29   | 0.0088  | 0.8400 | 0.0000 | 0.7148 | 0.9997 |
| Au L    | 25.18 | 3.45     | 4.89    | 984.01   | 0.1759  | 0.6700 | 0.0000 | 1.0443 | 0.9987 |

# EDAX TEAM EDS

## hisAuFe3O4

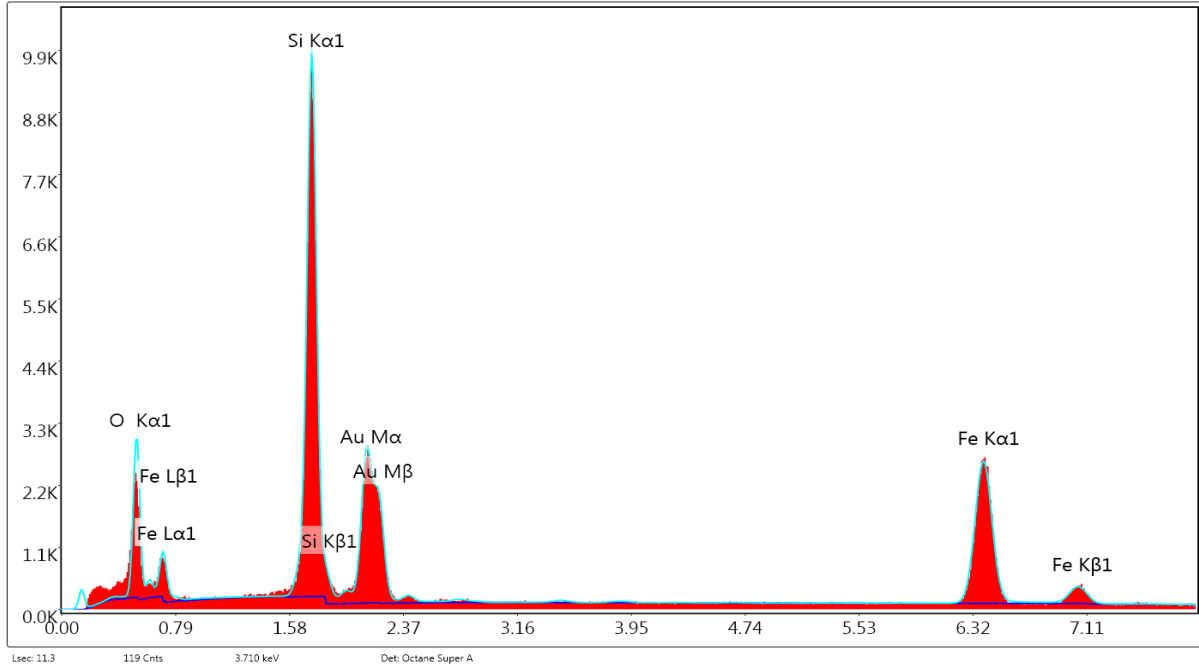

| Element | Wt %  | Atomic % | Error % | Net Int. | K Ratio | Z      | R      | A      | F      |
|---------|-------|----------|---------|----------|---------|--------|--------|--------|--------|
| O K     | 24.26 | 51.06    | 9.36    | 1500.24  | 0.0680  | 1.1972 | 0.0000 | 0.2343 | 1.0000 |
| Fe L    | 15.72 | 9.48     | 9.21    | 343.12   | 0.0569  | 0.9587 | 0.0000 | 0.3773 | 1.0000 |
| Si K    | 28.40 | 34.06    | 5.29    | 7327.86  | 0.1871  | 1.1101 | 0.0000 | 0.5926 | 1.0015 |
| Au L    | 31.62 | 5.41     | 7.41    | 881.38   | 0.2300  | 0.7036 | 0.0000 | 1.0365 | 0.9972 |



# EDAX TEAM EDS

## hisAuFe3O4

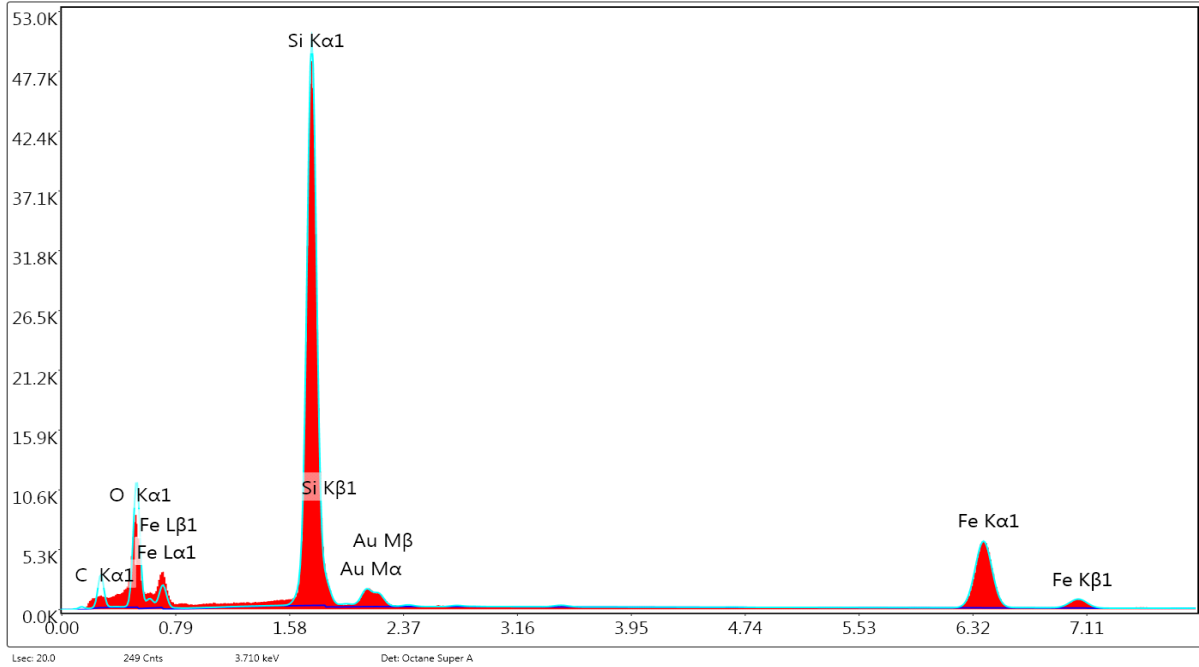

| Element | Wt %  | Atomic % | Error % | Net Int. | K Ratio | Z      | R      | A      | F      |
|---------|-------|----------|---------|----------|---------|--------|--------|--------|--------|
| C K     | 20.76 | 36.26    | 10.23   | 728.90   | 0.0349  | 1.1079 | 0.0000 | 0.1520 | 1.0000 |
| O K     | 24.96 | 32.73    | 9.12    | 3241.74  | 0.0541  | 1.0674 | 0.0000 | 0.2031 | 1.0000 |
| Fe L    | 20.85 | 7.83     | 7.55    | 1095.29  | 0.0668  | 0.8535 | 0.0000 | 0.3755 | 1.0000 |
| Si K    | 30.63 | 22.88    | 4.44    | 20860.12 | 0.1960  | 0.9826 | 0.0000 | 0.6503 | 1.0019 |
| Au L    | 2.80  | 0.30     | 15.43   | 185.43   | 0.0178  | 0.6069 | 0.0000 | 1.0526 | 0.9956 |

# EDAX TEAM EDS

## tioAuFe3O4

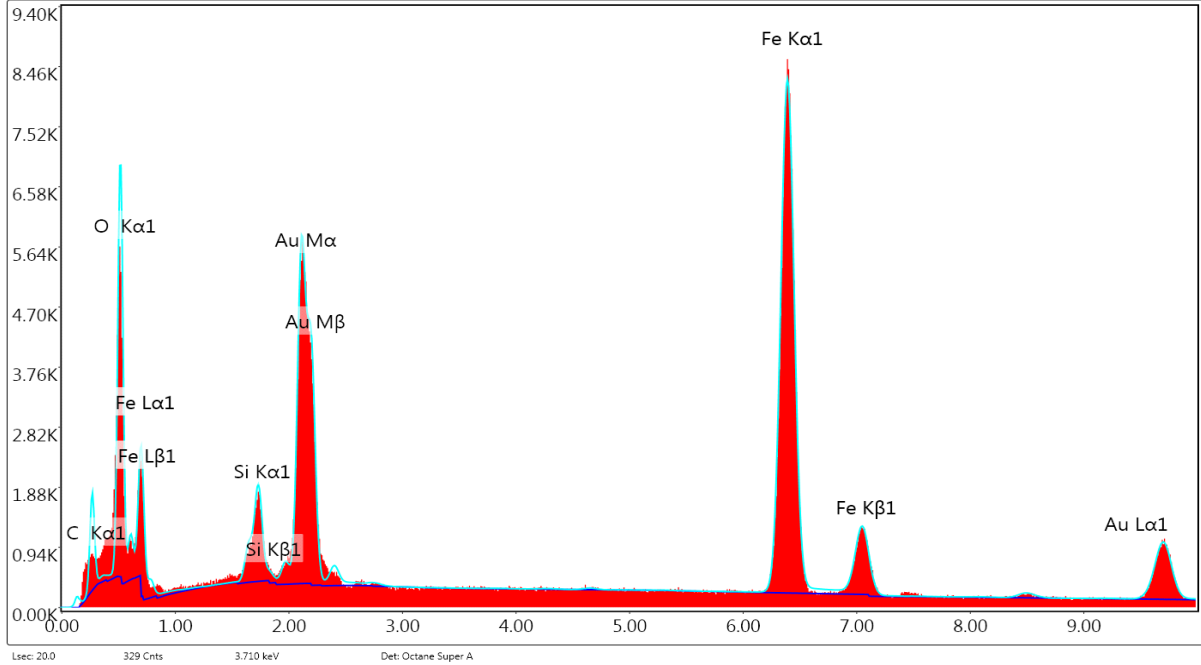

Lsec: 20.0 329 Cnts 3.710 keV Det: Octane Super-A

| Element | Wt %  | Atomic % | Error % | Net Int. | K Ratio | Z      | R      | A      | F      |
|---------|-------|----------|---------|----------|---------|--------|--------|--------|--------|
| C K     | 12.57 | 29.75    | 10.04   | 362.13   | 0.0427  | 1.2302 | 0.0000 | 0.2761 | 1.0000 |
| O K     | 28.85 | 51.25    | 9.04    | 1937.55  | 0.0816  | 1.1879 | 0.0000 | 0.2382 | 1.0000 |
| Fe L    | 23.55 | 11.98    | 8.50    | 498.97   | 0.0760  | 0.9483 | 0.0000 | 0.3404 | 1.0000 |
| Si K    | 2.26  | 2.28     | 7.01    | 544.39   | 0.0135  | 1.1003 | 0.0000 | 0.5435 | 1.0018 |
| Au L    | 32.76 | 4.73     | 6.33    | 843.43   | 0.2319  | 0.6892 | 0.0000 | 1.0313 | 0.9957 |

# EDAX TEAM EDS

## tioAuFe3O4

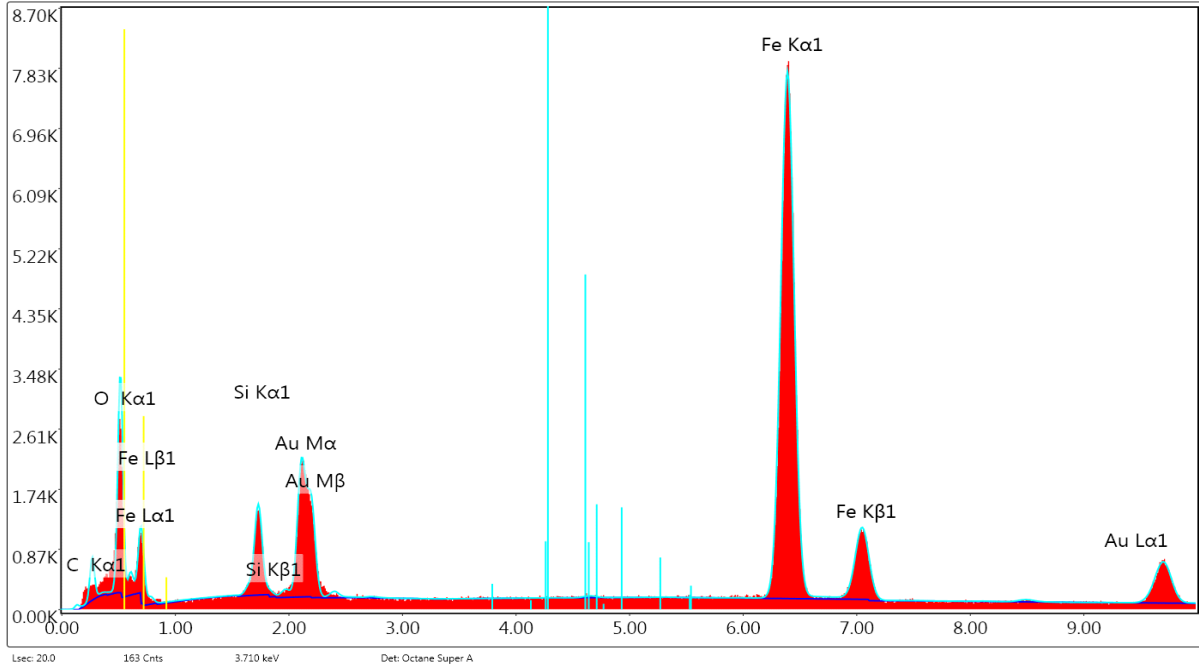

| Element | Wt %  | Atomic % | Error % | Net Int. | K Ratio | Z      | R      | A      | F      |
|---------|-------|----------|---------|----------|---------|--------|--------|--------|--------|
| C K     | 10.22 | 26.45    | 11.70   | 150.13   | 0.0335  | 1.2600 | 0.0000 | 0.2599 | 1.0000 |
| O K     | 26.84 | 52.17    | 9.38    | 935.63   | 0.0745  | 1.2168 | 0.0000 | 0.2282 | 1.0000 |
| Fe L    | 19.68 | 10.96    | 9.21    | 227.44   | 0.0655  | 0.9715 | 0.0000 | 0.3426 | 1.0000 |
| Si K    | 3.78  | 4.19     | 7.02    | 499.68   | 0.0235  | 1.1279 | 0.0000 | 0.5492 | 1.0017 |
| Au L    | 39.48 | 6.23     | 8.14    | 554.19   | 0.2879  | 0.7106 | 0.0000 | 1.0297 | 0.9967 |

# EDAX TEAM EDS

## tiO<sub>2</sub>AuFe<sub>3</sub>O<sub>4</sub>

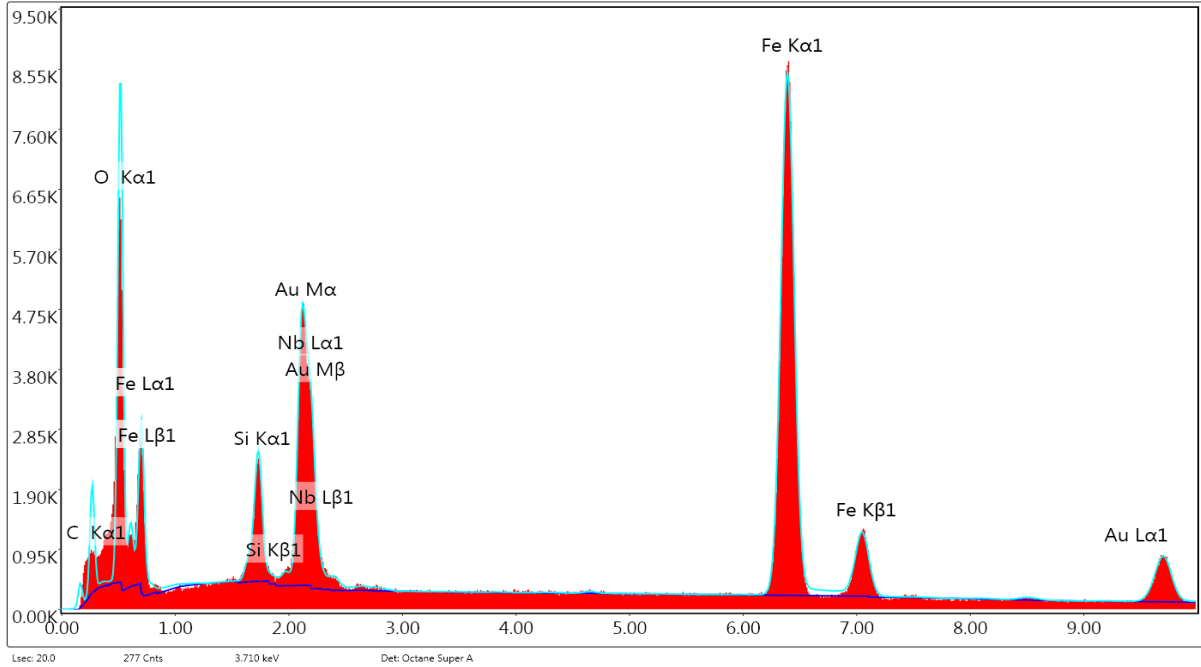

| Element | Wt %  | Atomic % | Error % | Net Int. | K Ratio | Z      | R      | A      | F      |
|---------|-------|----------|---------|----------|---------|--------|--------|--------|--------|
| C K     | 13.55 | 30.01    | 10.11   | 426.76   | 0.0415  | 1.2013 | 0.0000 | 0.2551 | 1.0000 |
| O K     | 30.07 | 50.02    | 8.97    | 2392.37  | 0.0831  | 1.1596 | 0.0000 | 0.2384 | 1.0000 |
| Fe L    | 27.51 | 13.11    | 8.35    | 687.10   | 0.0863  | 0.9255 | 0.0000 | 0.3391 | 1.0000 |
| Si K    | 3.06  | 2.90     | 7.00    | 869.46   | 0.0178  | 1.0728 | 0.0000 | 0.5420 | 1.0020 |
| Nb L    | 3.13  | 0.90     | 6.96    | 447.33   | 0.0232  | 0.8439 | 0.0000 | 0.8776 | 1.0003 |
| Au L    | 22.69 | 3.07     | 6.82    | 686.99   | 0.1557  | 0.6674 | 0.0000 | 1.0334 | 0.9952 |

# EDAX TEAM EDS

## tioAuFe3O4

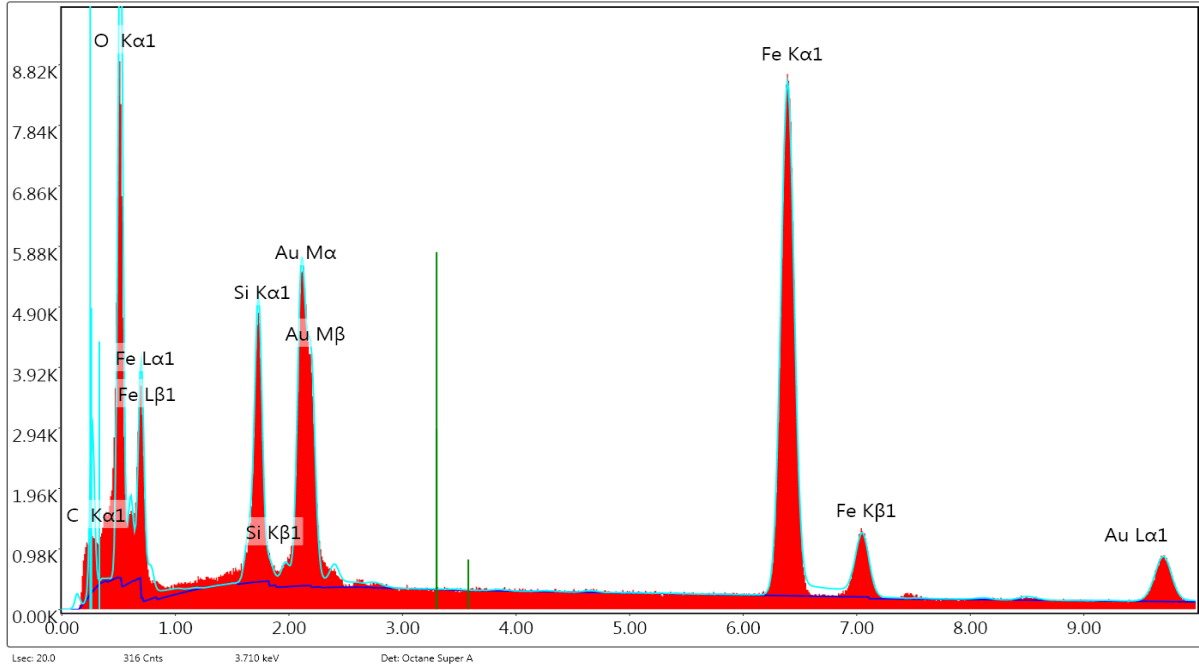

| Element | Wt %  | Atomic % | Error % | Net Int. | K Ratio | Z      | R      | A      | F      |
|---------|-------|----------|---------|----------|---------|--------|--------|--------|--------|
| C K     | 16.50 | 33.59    | 9.44    | 695.85   | 0.0503  | 1.1737 | 0.0000 | 0.2596 | 1.0000 |
| O K     | 30.47 | 46.57    | 8.77    | 3358.27  | 0.0867  | 1.1325 | 0.0000 | 0.2512 | 1.0000 |
| Fe L    | 29.88 | 13.09    | 8.14    | 1007.21  | 0.0940  | 0.9036 | 0.0000 | 0.3481 | 1.0000 |
| Si K    | 5.20  | 4.53     | 6.17    | 1959.43  | 0.0298  | 1.0463 | 0.0000 | 0.5473 | 1.0020 |
| Au L    | 17.95 | 2.23     | 7.46    | 710.06   | 0.1196  | 0.6472 | 0.0000 | 1.0357 | 0.9935 |
